# Supplementary material for: A genotyping method combining primer competition PCR with HRM analysis to identify point mutations in Duchenne animal models
Source: PubMed Central journal article supplement (PMC7560699; doi:10.1038/s41598-020-74173-y), 2020-10-14
Supplement: 41598_2020_74173_MOESM1_ESM.pdf [file 41598_2020_74173_MOESM1_ESM.pdf]

**A genotyping method combining primer competition PCR with HRM analysis to identify point mutations in Duchenne animal models**

Haizpea Lasa-Fernandez, Laura Mosqueira-Martín, Ainhoa Alzualde, Jaione Lasa-Elgarresta, and Ainar Vallejo-Illarramendi

Supplementary information

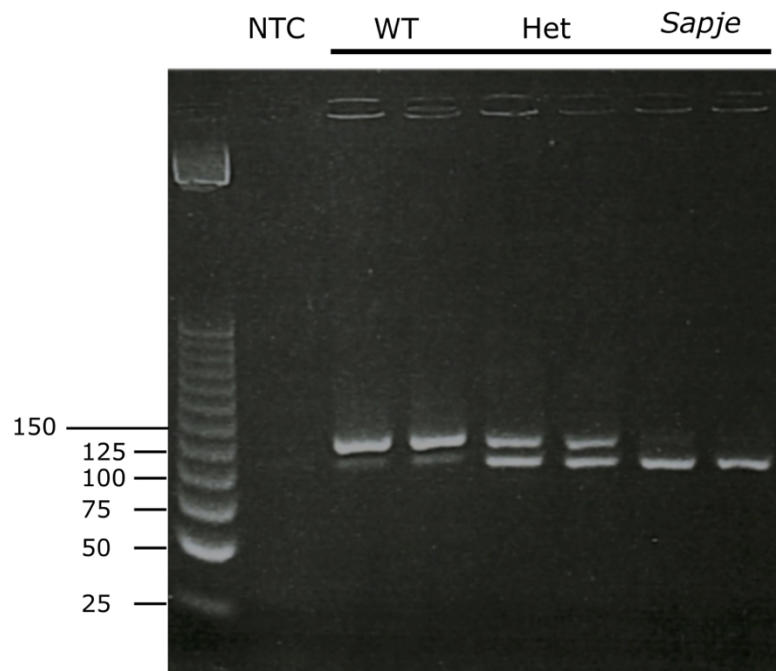

**Supplementary Figure S1.** Optimization of the pcPCR extension and annealing temperature. pcPCR amplification at 60°C results in non-specific additional bands in homozygous samples. These unspecific bands are not observed or greatly diminished at 65°C (Figures 2, 3).

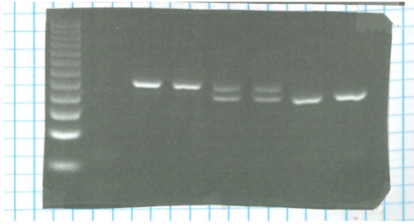

Figure 2

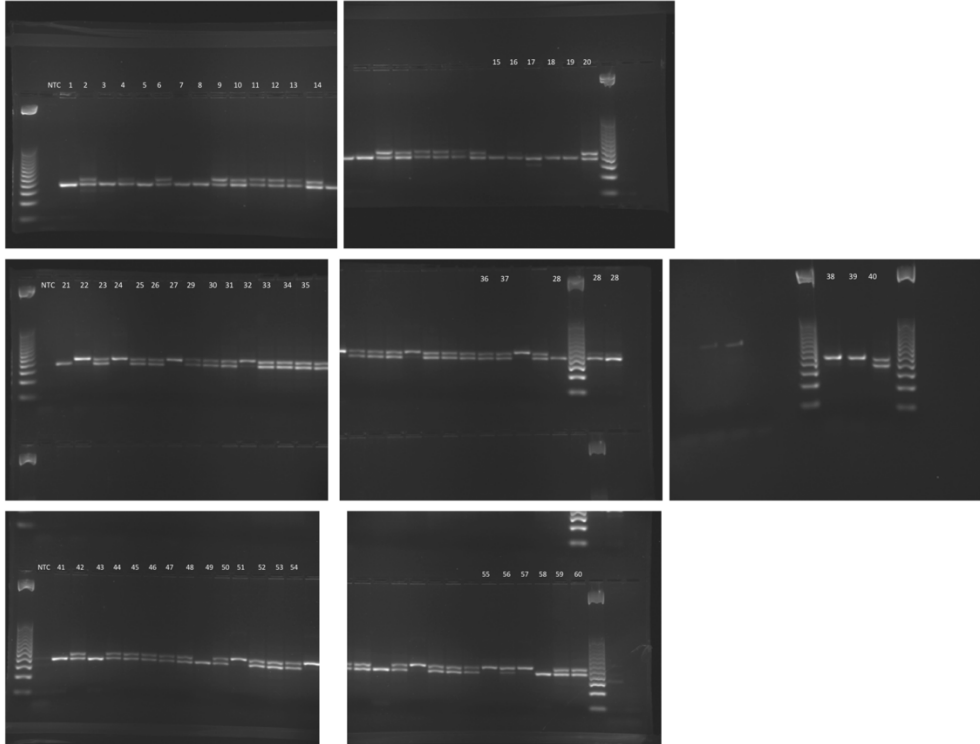

Figure 3

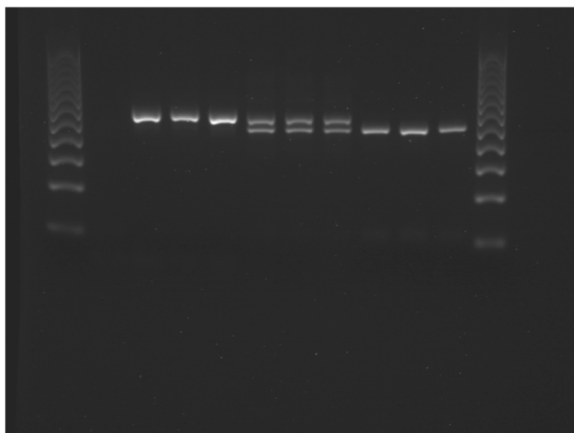

Figure 5 blots

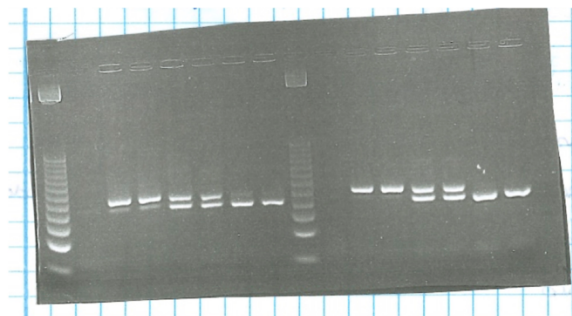

Supplementary Figure 1

**Supplementary Figure S2.** Uncropped original images from agarose gels

**Supplementary Table S1. Genotype and phenotype analyses in 60 zebrafish larvae.** *Sapje* phenotype was determined by birefringence analysis. HRM data shows genotypes resolved by HRM analysis of pcPCR products. Cluster, percentage confidence (highest % value), and melting temperature ( $T_m$ , mean  $\pm$  SD) values are extracted from the HRM analysis. Gel refers to genotypes resolved by 3% agarose gel electrophoresis. Seq refers to genotypes resolved by Sanger sequencing.

| Sample | Phenotype    | Cluster | Confidence % | $T_m$            | HRM          | Gel          | Seq          |
|--------|--------------|---------|--------------|------------------|--------------|--------------|--------------|
| 1      | <i>Sapje</i> | 2       | 99.8         | 79.17 $\pm$ 0.06 | <i>Sapje</i> | <i>Sapje</i> | <i>Sapje</i> |
| 2      | Unaffected   | 1       | 98.0         | 78.77 $\pm$ 0.06 | Het          | Het          |              |
| 3      | <i>Sapje</i> | 2       | 98.7         | 79.13 $\pm$ 0.06 | <i>Sapje</i> | <i>Sapje</i> |              |
| 4      | <i>Sapje</i> | 2       | 92.9         | 78.9 $\pm$ 0.0   | <i>Sapje</i> | <i>Sapje</i> |              |
| 5      | <i>Sapje</i> | 2       | 99.9         | 79.1 $\pm$ 0.0   | <i>Sapje</i> | <i>Sapje</i> |              |
| 6      | Unaffected   | 1       | 99.4         | 78.8 $\pm$ 0.0   | Het          | Het          | Het          |
| 7      | <i>Sapje</i> | 2       | 94.2         | 78.97 $\pm$ 0.06 | <i>Sapje</i> | <i>Sapje</i> |              |
| 8      | <i>Sapje</i> | 2       | 99.3         | 79.13 $\pm$ 0.06 | <i>Sapje</i> | <i>Sapje</i> | <i>Sapje</i> |
| 9      | Unaffected   | 1       | 94.6         | 78.77 $\pm$ 0.06 | Het          | Het          | Het          |
| 10     | Unaffected   | 1       | 98.1         | 78.83 $\pm$ 0.06 | Het          | Het          |              |
| 11     | Unaffected   | 1       | 99.3         | 78.8 $\pm$ 0.0   | Het          | Het          |              |
| 12     | Unaffected   | 1       | 99.4         | 78.77 $\pm$ 0.06 | Het          | Het          |              |
| 13     | Unaffected   | 1       | 99.7         | 78.8 $\pm$ 0.0   | Het          | Het          |              |
| 14     | Unaffected   | 1       | 98.5         | 78.77 $\pm$ 0.06 | Het          | Het          |              |
| 15     | <i>Sapje</i> | 2       | 99.5         | 79.1 $\pm$ 0.0   | <i>Sapje</i> | <i>Sapje</i> |              |
| 16     | <i>Sapje</i> | 2       | 97.9         | 79 $\pm$ 0.10    | <i>Sapje</i> | <i>Sapje</i> | <i>Sapje</i> |
| 17     | <i>Sapje</i> | 2       | 98.0         | 79.1 $\pm$ 0.0   | <i>Sapje</i> | <i>Sapje</i> |              |
| 18     | <i>Sapje</i> | 2       | 99.6         | 79.1 $\pm$ 0.0   | <i>Sapje</i> | <i>Sapje</i> |              |
| 19     | <i>Sapje</i> | 2       | 99.6         | 79.1 $\pm$ 0.0   | <i>Sapje</i> | <i>Sapje</i> |              |
| 20     | Unaffected   | 1       | 94.5         | 78.7 $\pm$ 0.0   | Het          | Het          |              |
| 21     | <i>Sapje</i> | 2       | 99.3         | 79.1 $\pm$ 0.0   | <i>Sapje</i> | <i>Sapje</i> | <i>Sapje</i> |
| 22     | Unaffected   | 3       | 98.4         | 78.7 $\pm$ 0.0   | WT           | WT           | WT           |
| 23     | Unaffected   | 1       | 99.6         | 78.8 $\pm$ 0.0   | Het          | Het          | Het          |
| 24     | Unaffected   | 3       | 98.6         | 78.7 $\pm$ 0.0   | WT           | WT           |              |
| 25     | Unaffected   | 1       | 99.8         | 78.7 $\pm$ 0.17  | Het          | Het          |              |
| 26     | Unaffected   | 1       | 99.5         | 78.8 $\pm$ 0.0   | Het          | Het          |              |
| 27     | Unaffected   | 3       | 98.3         | 78.7 $\pm$ 0.0   | WT           | WT           | WT           |
| 28     | <i>Sapje</i> | 2       | 60.4         | 78.9             | <i>Sapje</i> | <i>Sapje</i> | <i>Sapje</i> |
|        |              | 1       | 97.7         | 78.9             | Het          |              |              |
|        |              | 2       | 98.0         | 79               | <i>Sapje</i> |              |              |
| 29     | Unaffected   | 1       | 99.4         | 78.8 $\pm$ 0.0   | Het          | Het          |              |
| 30     | Unaffected   | 1       | 99.8         | 78.8 $\pm$ 0.0   | Het          | Het          |              |
| 31     | Unaffected   | 1       | 99.4         | 78.8 $\pm$ 0.0   | Het          | Het          |              |
| 32     | Unaffected   | 3       | 98.7         | 78.7 $\pm$ 0.0   | WT           | WT           |              |
| 33     | Unaffected   | 1       | 99.2         | 78.77 $\pm$ 0.06 | Het          | Het          |              |
| 34     | Unaffected   | 1       | 99.7         | 78.8 $\pm$ 0.0   | Het          | Het          |              |
| 35     | Unaffected   | 1       | 99.5         | 78.8 $\pm$ 0.0   | Het          | Het          |              |
| 36     | Unaffected   | 1       | 99.6         | 78.7 $\pm$ 0.0   | Het          | Het          |              |
| 37     | Unaffected   | 1       | 99.3         | 78.8 $\pm$ 0.0   | Het          | Het          |              |
| 38     | Unaffected   | 3       | 98.2         | 78.7 $\pm$ 0.0   | WT           | WT           |              |
| 39     | Unaffected   | 3       | 98.2         | 78.7 $\pm$ 0.0   | WT           | WT           | WT           |

|    |              |   |      |              |              |              |              |
|----|--------------|---|------|--------------|--------------|--------------|--------------|
| 40 | Unaffected   | 1 | 71.7 | 78.6         | Het          | Het          | Het          |
|    |              | 1 | 98.3 | 78.7         | Het          |              |              |
|    |              | 3 | 92.6 | 78.6         | WT           |              |              |
| 41 | <i>Sapje</i> | 2 | 99.3 | 79.1 ± 0.0   | <i>Sapje</i> | <i>Sapje</i> | <i>Sapje</i> |
| 42 | Unaffected   | 1 | 99.5 | 78.8 ± 0.0   | Het          | Het          |              |
| 43 | <i>Sapje</i> | 2 | 99.6 | 79 ± 0.0     | <i>Sapje</i> | <i>Sapje</i> | <i>Sapje</i> |
| 44 | Unaffected   | 1 | 99.7 | 78.7 ± 0.0   | Het          | Het          |              |
| 45 | Unaffected   | 1 | 99.6 | 78.8 ± 0.0   | Het          | Het          |              |
| 46 | Unaffected   | 1 | 99.7 | 78.7 ± 0.0   | Het          | Het          | Het          |
| 47 | Unaffected   | 1 | 99.5 | 78.77 ± 0.06 | Het          | Het          |              |
| 48 | Unaffected   | 1 | 99.1 | 78.7 ± 0.0   | Het          | Het          |              |
| 49 | <i>Sapje</i> | 2 | 99.6 | 79.1 ± 0.0   | <i>Sapje</i> | <i>Sapje</i> |              |
| 50 | Unaffected   | 1 | 99.7 | 78.8 ± 0.0   | Het          | Het          |              |
| 51 | Unaffected   | 3 | 98.7 | 78.6 ± 0.17  | WT           | WT           |              |
| 52 | Unaffected   | 1 | 99.4 | 78.77 ± 0.06 | Het          | Het          |              |
| 53 | Unaffected   | 1 | 99.8 | 78.73 ± 0.06 | Het          | Het          |              |
| 54 | Unaffected   | 1 | 99.7 | 78.73 ± 0.06 | Het          | Het          | Het          |
| 55 | Unaffected   | 3 | 99.2 | 78.77 ± 0.06 | WT           | WT           | WT           |
| 56 | Unaffected   | 3 | 99.2 | 78.73 ± 0.06 | WT           | WT           | WT           |
| 57 | Unaffected   | 3 | 98.7 | 78.73 ± 0.06 | WT           | WT           |              |
| 58 | <i>Sapje</i> | 2 | 98.9 | 79.1 ± 0.0   | <i>Sapje</i> | <i>Sapje</i> |              |
| 59 | Unaffected   | 1 | 99.6 | 78.77 ± 0.06 | Het          | Het          |              |
| 60 | Unaffected   | 1 | 99.7 | 78.8 ± 0.0   | Het          | Het          |              |

**Supplementary Table S2. Raw dataset and statistical parameters generated from the intra- and inter-assays using 60 zebrafish larvae.** Melting temperatures (T<sub>m</sub>, Mean, and SD) from 3 pcPCR-HRM independent runs, with their corresponding coefficients of variation (CV, %).

| Genotype     | Sample | Run 1                |       |              |             |                 | Run 2                |       |              |             |                 | Run 3                |       |              |             |                 | Inter-assay |              |             |                 |
|--------------|--------|----------------------|-------|--------------|-------------|-----------------|----------------------|-------|--------------|-------------|-----------------|----------------------|-------|--------------|-------------|-----------------|-------------|--------------|-------------|-----------------|
|              |        | T <sub>m</sub>       | Mean  | SD           | CV %        | Intra-assay CV% | T <sub>m</sub>       | Mean  | SD           | CV %        | Intra-assay CV% | T <sub>m</sub>       | Mean  | SD           | CV %        | Intra-assay CV% | Mean        | SD           | CV %        | Inter-assay CV% |
| <i>Sapje</i> | 1      | 79.1<br>79.2<br>79.2 | 79.17 | 0.06         | 0.07        |                 | 79.2<br>79.2<br>79.2 | 79.2  | 0            | 0           |                 | 79.1<br>79.1<br>79.1 | 79.1  | 0            | 0           |                 | 79.16       | 0.05         | 0.06        |                 |
|              | 3      | 79.2<br>79.1<br>79.1 | 79.13 | 0.06         | 0.07        |                 | 79.2<br>79.1<br>79.1 | 79.13 | 0.06         | 0.07        |                 | 79.1<br>79.1<br>79.1 | 79.1  | 0            | 0           |                 | 79.12       | 0.02         | 0.02        |                 |
|              | 4      | 78.9<br>78.9<br>78.9 | 78.9  | 0            | 0           |                 | 79.0<br>79.0<br>79.0 | 79.0  | 0            | 0           |                 | 79.1<br>79.1<br>79.1 | 79.1  | 0            | 0           |                 | 79          | 0.10         | 0.13        |                 |
|              | 5      | 79.1<br>79.1<br>79.1 | 79.1  | 0            | 0           |                 | 79.2<br>79.1<br>79.1 | 79.13 | 0.06         | 0.07        |                 | 79.1<br>79.1<br>79.0 | 79.07 | 0.06         | 0.07        |                 | 79.1        | 0.03         | 0.04        |                 |
|              | 7      | 79.0<br>79.0<br>78.9 | 78.97 | 0.06         | 0.07        |                 | 79.0<br>79.0<br>78.9 | 78.97 | 0.06         | 0.07        |                 | 78.8<br>78.8<br>78.8 | 78.8  | 0            | 0           |                 | 78.91       | 0.10         | 0.12        |                 |
|              | 8      | 79.2<br>79.1<br>79.1 | 79.13 | 0.06         | 0.07        |                 | 79.2<br>79.2<br>79.1 | 79.17 | 0.06         | 0.07        |                 | 79.1<br>79.1<br>79.1 | 79.1  | 0            | 0           |                 | 79.13       | 0.03         | 0.04        |                 |
|              | 15     | 79.1<br>79.1<br>79.1 | 79.1  | 0            | 0           |                 | 79.1<br>79.1<br>79.1 | 79.1  | 0            | 0           |                 | 79.1<br>79.1<br>79.1 | 79.1  | 0            | 0           |                 | 79.1        | 0            | 0           |                 |
|              | 16     | 78.9<br>79.0<br>79.1 | 79    | 0.10         | 0.13        |                 | 79.0<br>79.1<br>79.1 | 79.07 | 0.06         | 0.07        |                 | 79.2<br>79.1<br>79.1 | 79.13 | 0.06         | 0.07        |                 | 79.07       | 0.07         | 0.08        |                 |
|              | 17     | 79.1<br>79.1<br>79.1 | 79.1  | 0            | 0           |                 | 79.1<br>79.1<br>79.1 | 79.1  | 0            | 0           |                 | 79.1<br>79.1<br>79.1 | 79.1  | 0            | 0           |                 | 79.1        | 0            | 0           |                 |
|              | 18     | 79.1<br>79.1<br>79.1 | 79.1  | 0            | 0           |                 | 79.1<br>79.1<br>79.2 | 79.13 | 0.06         | 0.07        |                 | 79.1<br>79.1<br>79.1 | 79.1  | 0            | 0           |                 | 79.11       | 0.02         | 0.02        |                 |
|              | 19     | 79.1<br>79.1<br>79.1 | 79.1  | 0            | 0           |                 | 79.1<br>79.2<br>79.2 | 79.17 | 0.06         | 0.07        |                 | 79.1<br>79.1<br>79.1 | 79.1  | 0            | 0           |                 | 79.12       | 0.04         | 0.05        |                 |
|              | 21     | 79.1<br>79.1<br>79.1 | 79.1  | 0            | 0           |                 | 79.2<br>79.1<br>79.1 | 79.13 | 0.06         | 0.07        |                 | 79.0<br>79.0<br>79.0 | 79.0  | 0            | 0           |                 | 79.08       | 0.07         | 0.09        |                 |
|              | 28     | 78.9<br>78.9<br>79.0 | 78.93 | 0.06         | 0.07        |                 | 79.0<br>79.0<br>79.1 | 79.03 | 0.06         | 0.07        |                 | 79.1<br>79.1<br>79.1 | 79.1  | 0            | 0           |                 | 79.02       | 0.08         | 0.11        |                 |
|              | 41     | 79.1<br>79.1<br>79.1 | 79.1  | 0            | 0           |                 | 79.1<br>79.1<br>79.1 | 79.1  | 0            | 0           |                 | 79.1<br>79.1<br>79.0 | 79.07 | 0.06         | 0.07        |                 | 79.09       | 0.02         | 0.02        |                 |
|              | 43     | 79.0<br>79.0<br>79.0 | 79    | 0            | 0           |                 | 79.1<br>79.1<br>79.0 | 79.07 | 0.06         | 0.07        |                 | 78.8<br>78.8<br>78.8 | 78.8  | 0            | 0           |                 | 78.96       | 0.14         | 0.18        |                 |
|              | 49     | 79.1<br>79.1<br>79.1 | 79.1  | 0            | 0           |                 | 79.1<br>79.1<br>79.1 | 79.1  | 0            | 0           |                 | 79.0<br>79.1<br>79.0 | 79.03 | 0.06         | 0.07        |                 | 79.08       | 0.04         | 0.05        |                 |
|              | 58     | 79.1<br>79.1<br>79.1 | 79.1  | 0            | 0           |                 | 79.1<br>79.1<br>79.1 | 79.1  | 0            | 0           |                 | 79.0<br>79.0<br>79.0 | 79    | 0            | 0           |                 | 79.07       | 0.06         | 0.07        |                 |
|              |        | <b>Total</b>         |       | <b>79.07</b> | <b>0.08</b> |                 | <b>0.10</b>          |       | <b>79.10</b> | <b>0.06</b> |                 | <b>0.08</b>          |       | <b>79.05</b> | <b>0.10</b> |                 | <b>0.13</b> | <b>79.07</b> | <b>0.03</b> |                 |

|              |                      |                      |                      |                      |                      |                      |                   |                 |
|--------------|----------------------|----------------------|----------------------|----------------------|----------------------|----------------------|-------------------|-----------------|
| WT           | 22                   | 78.7 78.7 0 0        |                      | 78.8 78.77 0.06 0.07 |                      | 78.7 78.7 0 0        |                   | 78.72 0.04 0.05 |
|              |                      | 78.7                 |                      | 78.8                 |                      | 78.7                 |                   |                 |
|              |                      | 78.7                 |                      | 78.7                 |                      | 78.7                 |                   |                 |
|              | 24                   | 78.7 78.7 0 0        |                      | 78.7 78.7 0 0        |                      | 78.7 78.7 0 0        |                   | 78.7 0 0        |
|              |                      | 78.7                 |                      | 78.7                 |                      | 78.7                 |                   |                 |
|              |                      | 78.7                 |                      | 78.7                 |                      | 78.7                 |                   |                 |
|              | 27                   | 78.7 78.7 0 0        |                      | 78.8 78.77 0.06 0.07 |                      | 78.7 78.7 0 0        |                   | 78.72 0.04 0.05 |
|              |                      | 78.7                 |                      | 78.8                 |                      | 78.7                 |                   |                 |
|              |                      | 78.7                 |                      | 78.7                 |                      | 78.7                 |                   |                 |
|              | 32                   | 78.7 78.7 0 0        |                      | 78.8 78.8 0 0        |                      | 78.8 78.77 0.06 0.07 |                   | 78.76 0.05 0.06 |
|              | 78.7                 |                      | 78.8                 |                      | 78.7                 |                      |                   |                 |
|              | 78.7                 |                      | 78.8                 |                      | 78.8                 |                      |                   |                 |
| 38           | 78.7 78.7 0 0        |                      | 78.8 78.73 0.06 0.07 |                      | 78.6 78.6 0 0        |                      | 78.68 0.07 0.09   |                 |
|              | 78.7                 |                      | 78.7                 |                      | 78.6                 |                      |                   |                 |
|              | 78.7                 |                      | 78.7                 |                      | 78.6                 |                      |                   |                 |
| 39           | 78.7 78.7 0 0        |                      | 78.8 78.73 0.06 0.07 |                      | 78.7 78.7 0 0        |                      | 78.71 0.02 0.02   |                 |
|              | 78.7                 |                      | 78.7                 |                      | 78.7                 |                      |                   |                 |
|              | 78.7                 |                      | 78.7                 |                      | 78.7                 |                      |                   |                 |
| 51           | 78.7 78.6 0.17 0.22  |                      | 78.7 78.63 0.12 0.15 |                      | 78.6 78.6 0 0        |                      | 78.61 0.02 0.02   |                 |
|              | 78.7                 |                      | 78.7                 |                      | 78.6                 |                      |                   |                 |
|              | 78.4                 |                      | 78.5                 |                      | 78.6                 |                      |                   |                 |
| 55           | 78.7 78.77 0.06 0.07 |                      | 78.8 78.8 0 0        |                      | 78.6 78.6 0 0        |                      | 78.72 0.11 0.14   |                 |
|              | 78.8                 |                      | 78.8                 |                      | 78.6                 |                      |                   |                 |
|              | 78.8                 |                      | 78.8                 |                      | 78.6                 |                      |                   |                 |
| 56           | 78.7 78.73 0.06 0.07 |                      | 78.8 78.8 0 0        |                      | 78.7 78.63 0.06 0.07 |                      | 78.72 0.08 0.11   |                 |
|              | 78.7                 |                      | 78.8                 |                      | 78.6                 |                      |                   |                 |
|              | 78.8                 |                      | 78.8                 |                      | 78.6                 |                      |                   |                 |
| 57           | 78.7 78.73 0.06 0.07 |                      | 78.8 78.8 0 0        |                      | 78.7 78.7 0 0        |                      | 78.74 0.05 0.06   |                 |
|              | 78.7                 |                      | 78.8                 |                      | 78.7                 |                      |                   |                 |
|              | 78.8                 |                      | 78.8                 |                      | 78.7                 |                      |                   |                 |
| <b>Total</b> | <b>78.70 0.04</b>    | <b>0.05</b>          | <b>78.75 0.05</b>    | <b>0.07</b>          | <b>78.67 0.06</b>    | <b>0.07</b>          | <b>78.71 0.04</b> | <b>0.05</b>     |
| Het          | 2                    | 78.8 78.77 0.06 0.07 |                      | 78.8 78.8 0 0        |                      | 78.6 78.8 0 0        |                   | 78.72 0.11 0.14 |
|              |                      | 78.8                 |                      | 78.8                 |                      | 78.6                 |                   |                 |
|              |                      | 78.7                 |                      | 78.8                 |                      | 78.6                 |                   |                 |
|              | 6                    | 78.8 78.8 0 0        |                      | 78.8 78.8 0 0        |                      | 78.7 78.7 0 0        |                   | 78.77 0.06 0.07 |
|              |                      | 78.8                 |                      | 78.8                 |                      | 78.7                 |                   |                 |
|              |                      | 78.8                 |                      | 78.8                 |                      | 78.7                 |                   |                 |
|              | 9                    | 78.8 78.77 0.06 0.07 |                      | 78.8 78.8 0 0        |                      | 78.7 78.7 0 0        |                   | 78.76 0.05 0.06 |
|              |                      | 78.7                 |                      | 78.8                 |                      | 78.7                 |                   |                 |
|              |                      | 78.8                 |                      | 78.8                 |                      | 78.7                 |                   |                 |
|              | 10                   | 78.9 78.83 0.06 0.07 |                      | 78.9 78.87 0.06 0.07 |                      | 78.6 78.6 0 0        |                   | 78.77 0.15 0.18 |
|              |                      | 78.8                 |                      | 78.9                 |                      | 78.6                 |                   |                 |
|              |                      | 78.8                 |                      | 78.8                 |                      | 78.6                 |                   |                 |
|              | 11                   | 78.8 78.8 0 0        |                      | 78.8 78.8 0 0        |                      | 78.7 78.7 0 0        |                   | 78.77 0.06 0.07 |
|              | 78.8                 |                      | 78.8                 |                      | 78.7                 |                      |                   |                 |
|              | 78.8                 |                      | 78.8                 |                      | 78.7                 |                      |                   |                 |
| 12           | 78.8 78.77 0.06 0.07 |                      | 78.8 78.8 0 0        |                      | 78.7 78.7 0 0        |                      | 78.76 0.05 0.06   |                 |
|              | 78.7                 |                      | 78.8                 |                      | 78.7                 |                      |                   |                 |
|              | 78.8                 |                      | 78.8                 |                      | 78.7                 |                      |                   |                 |
| 13           | 78.8 78.8 0 0        |                      | 78.8 78.8 0 0        |                      | 78.7 78.7 0 0        |                      | 78.77 0.06 0.07   |                 |
|              | 78.8                 |                      | 78.8                 |                      | 78.7                 |                      |                   |                 |
|              | 78.8                 |                      | 78.8                 |                      | 78.7                 |                      |                   |                 |
| 14           | 78.7 78.77 0.06 0.07 |                      | 78.8 78.8 0 0        |                      | 78.8 78.77 0.06 0.07 |                      | 78.78 0.02 0.02   |                 |
|              | 78.8                 |                      | 78.8                 |                      | 78.8                 |                      |                   |                 |
|              | 78.8                 |                      | 78.8                 |                      | 78.7                 |                      |                   |                 |
| 20           | 78.7 78.7 0 0        |                      | 78.8 78.8 0 0        |                      | 78.7 78.7 0 0        |                      | 78.73 0.06 0.07   |                 |
|              | 78.7                 |                      | 78.8                 |                      | 78.7                 |                      |                   |                 |
|              | 78.7                 |                      | 78.8                 |                      | 78.7                 |                      |                   |                 |
| 23           | 78.8 78.8 0 0        |                      | 78.8 78.8 0 0        |                      | 78.7 78.7 0 0        |                      | 78.77 0.06 0.07   |                 |
|              | 78.8                 |                      | 78.8                 |                      | 78.7                 |                      |                   |                 |
|              | 78.8                 |                      | 78.8                 |                      | 78.7                 |                      |                   |                 |
| 25           | 78.8 78.7 0.17 0.22  |                      | 78.8 78.73 0.12 0.15 |                      | 78.8 78.77 0.06 0.07 |                      | 78.73 0.03 0.04   |                 |
|              | 78.8                 |                      | 78.8                 |                      | 78.8                 |                      |                   |                 |
|              | 78.5                 |                      | 78.6                 |                      | 78.7                 |                      |                   |                 |
| 26           | 78.8 78.8 0 0        |                      | 78.8 78.8 0 0        |                      | 78.8 78.73 0.06 0.07 |                      | 78.78 0.04 0.05   |                 |
|              | 78.8                 |                      | 78.8                 |                      | 78.7                 |                      |                   |                 |
|              | 78.8                 |                      | 78.8                 |                      | 78.7                 |                      |                   |                 |
| 29           | 78.8 78.8 0 0        |                      | 78.8 78.8 0 0        |                      | 78.7 78.7 0 0        |                      | 78.77 0.06 0.07   |                 |
|              | 78.8                 |                      | 78.8                 |                      | 78.7                 |                      |                   |                 |

|  |              |                      |             |  |                      |             |  |                      |             |  |                   |                 |
|--|--------------|----------------------|-------------|--|----------------------|-------------|--|----------------------|-------------|--|-------------------|-----------------|
|  |              | 78.8                 |             |  | 78.8                 |             |  | 78.7                 |             |  |                   |                 |
|  | 30           | 78.8 78.8 0 0        |             |  | 78.8 78.8 0 0        |             |  | 78.7 78.7 0 0        |             |  |                   | 78.77 0.06 0.07 |
|  |              | 78.8                 |             |  | 78.8                 |             |  | 78.7                 |             |  |                   |                 |
|  |              | 78.8                 |             |  | 78.8                 |             |  | 78.7                 |             |  |                   |                 |
|  | 31           | 78.8 78.8 0 0        |             |  | 78.8 78.8 0 0        |             |  | 78.7 78.7 0 0        |             |  |                   | 78.77 0.06 0.07 |
|  |              | 78.8                 |             |  | 78.8                 |             |  | 78.7                 |             |  |                   |                 |
|  |              | 78.8                 |             |  | 78.8                 |             |  | 78.7                 |             |  |                   |                 |
|  | 33           | 78.8 78.77 0.06 0.07 |             |  | 78.9 78.87 0.06 0.07 |             |  | 78.7 78.7 0 0        |             |  |                   | 78.78 0.08 0.11 |
|  |              | 78.8                 |             |  | 78.9                 |             |  | 78.7                 |             |  |                   |                 |
|  |              | 78.7                 |             |  | 78.8                 |             |  | 78.7                 |             |  |                   |                 |
|  | 34           | 78.8 78.8 0 0        |             |  | 78.8 78.8 0 0        |             |  | 78.7 78.7 0 0        |             |  |                   | 78.77 0.06 0.07 |
|  |              | 78.8                 |             |  | 78.8                 |             |  | 78.7                 |             |  |                   |                 |
|  |              | 78.8                 |             |  | 78.8                 |             |  | 78.7                 |             |  |                   |                 |
|  | 35           | 78.8 78.8 0 0        |             |  | 78.8 78.8 0 0        |             |  | 78.7 78.7 0 0        |             |  |                   | 78.77 0.06 0.07 |
|  |              | 78.8                 |             |  | 78.8                 |             |  | 78.7                 |             |  |                   |                 |
|  |              | 78.8                 |             |  | 78.8                 |             |  | 78.7                 |             |  |                   |                 |
|  | 36           | 78.7 78.7 0 0        |             |  | 78.8 78.8 0 0        |             |  | 78.7 78.7 0 0        |             |  |                   | 78.73 0.06 0.07 |
|  |              | 78.7                 |             |  | 78.8                 |             |  | 78.7                 |             |  |                   |                 |
|  |              | 78.7                 |             |  | 78.8                 |             |  | 78.7                 |             |  |                   |                 |
|  | 37           | 78.8 78.8 0 0        |             |  | 78.8 78.8 0 0        |             |  | 78.7 78.7 0 0        |             |  |                   | 78.77 0.06 0.07 |
|  |              | 78.8                 |             |  | 78.8                 |             |  | 78.7                 |             |  |                   |                 |
|  |              | 78.8                 |             |  | 78.8                 |             |  | 78.7                 |             |  |                   |                 |
|  | 40           | 78.6 78.63 0.06 0.07 |             |  | 78.7 78.7 0 0        |             |  | 78.6 78.6 0 0        |             |  |                   | 78.64 0.05 0.06 |
|  |              | 78.7                 |             |  | 78.7                 |             |  | 78.6                 |             |  |                   |                 |
|  |              | 78.6                 |             |  | 78.7                 |             |  | 78.6                 |             |  |                   |                 |
|  | 42           | 78.8 78.8 0 0        |             |  | 78.8 78.8 0 0        |             |  | 78.7 78.67 0.06 0.07 |             |  |                   | 78.76 0.08 0.10 |
|  |              | 78.8                 |             |  | 78.8                 |             |  | 78.6                 |             |  |                   |                 |
|  |              | 78.8                 |             |  | 78.8                 |             |  | 78.7                 |             |  |                   |                 |
|  | 44           | 78.7 78.7 0 0        |             |  | 78.8 78.73 0.06 0.07 |             |  | 78.7 78.7 0 0        |             |  |                   | 78.71 0.02 0.02 |
|  |              | 78.7                 |             |  | 78.7                 |             |  | 78.7                 |             |  |                   |                 |
|  |              | 78.7                 |             |  | 78.7                 |             |  | 78.7                 |             |  |                   |                 |
|  | 45           | 78.8 78.8 0 0        |             |  | 78.8 78.8 0 0        |             |  | 78.7 78.7 0 0        |             |  |                   | 78.77 0.06 0.07 |
|  |              | 78.8                 |             |  | 78.8                 |             |  | 78.7                 |             |  |                   |                 |
|  |              | 78.8                 |             |  | 78.8                 |             |  | 78.7                 |             |  |                   |                 |
|  | 46           | 78.7 78.7 0 0        |             |  | 78.8 78.8 0 0        |             |  | 78.7 78.7 0 0        |             |  |                   | 78.73 0.06 0.07 |
|  |              | 78.7                 |             |  | 78.8                 |             |  | 78.7                 |             |  |                   |                 |
|  |              | 78.7                 |             |  | 78.8                 |             |  | 78.7                 |             |  |                   |                 |
|  | 47           | 78.7 78.77 0.06 0.07 |             |  | 78.8 78.8 0 0        |             |  | 78.6 78.6 0 0        |             |  |                   | 78.72 0.11 0.14 |
|  |              | 78.8                 |             |  | 78.8                 |             |  | 78.6                 |             |  |                   |                 |
|  |              | 78.8                 |             |  | 78.8                 |             |  | 78.6                 |             |  |                   |                 |
|  | 48           | 78.7 78.7 0 0        |             |  | 78.7 78.77 0.06 0.07 |             |  | 78.7 78.7 0 0        |             |  |                   | 78.72 0.04 0.05 |
|  |              | 78.7                 |             |  | 78.8                 |             |  | 78.7                 |             |  |                   |                 |
|  |              | 78.7                 |             |  | 78.8                 |             |  | 78.7                 |             |  |                   |                 |
|  | 50           | 78.8 78.8 0 0        |             |  | 78.8 78.8 0 0        |             |  | 78.7 78.7 0 0        |             |  |                   | 78.77 0.06 0.07 |
|  |              | 78.8                 |             |  | 78.8                 |             |  | 78.7                 |             |  |                   |                 |
|  |              | 78.8                 |             |  | 78.8                 |             |  | 78.7                 |             |  |                   |                 |
|  | 52           | 78.7 78.77 0.06 0.07 |             |  | 78.8 78.8 0 0        |             |  | 78.6 78.6 0 0        |             |  |                   | 78.72 0.11 0.14 |
|  |              | 78.8                 |             |  | 78.8                 |             |  | 78.6                 |             |  |                   |                 |
|  |              | 78.8                 |             |  | 78.8                 |             |  | 78.6                 |             |  |                   |                 |
|  | 53           | 78.8 78.73 0.06 0.07 |             |  | 78.8 78.8 0 0        |             |  | 78.7 78.7 0 0        |             |  |                   | 78.74 0.05 0.06 |
|  |              | 78.7                 |             |  | 78.8                 |             |  | 78.7                 |             |  |                   |                 |
|  |              | 78.7                 |             |  | 78.8                 |             |  | 78.7                 |             |  |                   |                 |
|  | 54           | 78.7 78.73 0.06 0.07 |             |  | 78.8 78.8 0 0        |             |  | 78.7 78.7 0 0        |             |  |                   | 78.74 0.05 0.06 |
|  |              | 78.7                 |             |  | 78.8                 |             |  | 78.7                 |             |  |                   |                 |
|  |              | 78.8                 |             |  | 78.8                 |             |  | 78.7                 |             |  |                   |                 |
|  | 59           | 78.7 78.77 0.06 0.07 |             |  | 78.8 78.83 0.06 0.07 |             |  | 78.7 78.7 0 0        |             |  |                   | 78.77 0.07 0.08 |
|  |              | 78.8                 |             |  | 78.8                 |             |  | 78.7                 |             |  |                   |                 |
|  |              | 78.8                 |             |  | 78.9                 |             |  | 78.7                 |             |  |                   |                 |
|  | 60           | 78.8 78.8 0 0        |             |  | 78.8 78.8 0 0        |             |  | 78.6 78.6 0 0        |             |  |                   | 78.73 0.12 0.15 |
|  |              | 78.8                 |             |  | 78.8                 |             |  | 78.6                 |             |  |                   |                 |
|  |              | 78.8                 |             |  | 78.8                 |             |  | 78.6                 |             |  |                   |                 |
|  | <b>Total</b> | <b>78.77 0.05</b>    | <b>0.06</b> |  | <b>78.80 0.03</b>    | <b>0.04</b> |  | <b>78.69 0.04</b>    | <b>0.06</b> |  | <b>78.75 0.06</b> | <b>0.07</b>     |
